# Supplementary material
Source: ML conference proceedings conference paper supplement (https://openreview.net/forum?id=JpNH4CW_zl)
Supplement: supplementary_material [file attachment]

## A MODEL DETAILS

### A.1 BP-GNN

In this section, we write down the equations of the BP-GNN model in its full form. Given the bipartite graph  $\mathcal{G} = (\mathcal{V}, \mathcal{U}, \mathcal{E})$  defined in Section 4, where  $\mathcal{V}$  is a set of  $N$  nodes corresponding to the  $N$  time series and  $\mathcal{U}$  is a set of  $K$  auxiliary nodes. Nodes  $\mathcal{V}$  have associated the time series embeddings  $\mathbf{z} = \{\mathbf{z}_1, \dots, \mathbf{z}_N\}$  and auxiliary nodes  $\mathcal{U}$  have associated the embeddings  $\mathbf{u} = \{\mathbf{u}_1, \dots, \mathbf{u}_K\}$  which are free learnable parameters.

Then, the total amount of nodes  $\mathcal{V} = \mathcal{V} \cup \mathcal{U}$  in the graph is  $N + K$ . And nodes in  $\mathcal{V}$  have associated the node embeddings  $\mathbf{h} = \{\mathbf{h}_1, \dots, \mathbf{h}_{N+K}\}$ , which at layer  $l = 0$  are initialized as  $\mathbf{h}^0 = \mathbf{z} \parallel \mathbf{u}$ . Then, equations of the Bipartite Graph Neural Network can be defined as:

| Step 1<br>$\mathcal{V} \rightarrow \mathcal{U}$                                            | Step 2<br>$\mathcal{U} \rightarrow \mathcal{V}$                                            |
|--------------------------------------------------------------------------------------------|--------------------------------------------------------------------------------------------|
| $i \in \mathcal{U} \quad \& \quad j \in \mathcal{V}$                                       | $i \in \mathcal{V} \quad \& \quad j \in \mathcal{U}$                                       |
| $\mathbf{m}_{ij} = \phi_{e_1}(\mathbf{h}_i^l, \mathbf{h}_j^l, a_{ij})$                     | $\mathbf{m}_{ij} = \phi_{e_2}(\mathbf{h}_i^l, \mathbf{h}_j^l, a_{ij})$                     |
| $\mathbf{m}_i = \sum_{j \in \mathcal{V}} \phi_{\alpha_1}(\mathbf{m}_{ij}) \mathbf{m}_{ij}$ | $\mathbf{m}_i = \sum_{j \in \mathcal{U}} \phi_{\alpha_2}(\mathbf{m}_{ij}) \mathbf{m}_{ij}$ |
| $\mathbf{h}_i^{l+1} = \phi_{h_1}(\mathbf{h}_i^l, \mathbf{m}_i)$                            | $\mathbf{h}_i^{l+1} = \phi_{h_2}(\mathbf{h}_i^l, \mathbf{m}_i)$                            |

Table 7: BP-GNN formulation.

Where Step 1 propagates messages from nodes  $\mathcal{V}$  (time series) to nodes  $\mathcal{U}$  (auxiliary nodes) and Step 2 propagates messages the other way around.

### A.2 ARCHITECTURE CHOICES $\phi_e, \phi_\alpha, \phi_h, f_{enc}$ AND $f_{dec}$

In this section we will use the shortcut  $\text{MLP}_{res}$  for a one layer MLP with a residual connection which we define as:

$$\text{Input} \rightarrow \{\text{LinearLayer}(\text{nf}, \text{nf}) \rightarrow \text{Swish}() \rightarrow \text{LinearLayer}(\text{nf}, \text{nf}) \rightarrow \text{Addition}(\text{Input})\} \rightarrow \text{Output}$$

Where "nf" represents the number of features.

#### Decoder $f_{dec}$

Given the above  $\text{MLP}_{res}$  definition, the decoder consists of one residual MLP followed by a linear layer:

$$\hat{\mathbf{z}}_i \rightarrow \{\text{MLP}_{res} \rightarrow \text{LinearLayer}(\text{nf}, \text{out\_dim})\} \rightarrow \hat{\mathbf{x}}_{i,t+1:T}$$

#### Encoder $f_{enc}$

The encoder for METR-LA and PEMS-BAY consists of a linear layer and two consecutive  $\text{MLP}_{res}$ . Notice the overall structure can be considered an MLP with residual connections among some of its layers.

$$\mathbf{x}_{i,t_0:t} \rightarrow \{\text{LinearLayer}(\text{in\_dim}, \text{nf}) \rightarrow \text{MLP}_{res} \rightarrow \text{MLP}_{res} \rightarrow \text{concatenate}(\mathbf{c}_i)\} \rightarrow \mathbf{z}_i$$

In the other datasets (Solar-Energy, Traffic, Electricity and Exchange-Rate) we used the following Convolutional Neural Network as an encoder:

$$\begin{aligned} \mathbf{x}_{i,t_0:t} &\rightarrow \{\text{conv1d}(\text{in\_dim}, \text{nf}, \text{kernel\_size}, \text{stride}) \rightarrow \text{CNN}_{res}(\text{nf}) \\ &\rightarrow \text{conv1d}(\text{nf}, 2\text{nf}, \text{kernel\_size}, \text{stride}) \rightarrow \text{CNN}_{res}(2\text{nf}) \\ &\rightarrow \text{conv1d}(2\text{nf}, 4\text{nf}, \text{kernel\_size}, \text{stride}) \rightarrow \text{CNN}_{res}(4\text{nf}) \\ &\rightarrow \text{conv1d}(4\text{nf}, \text{out\_dim}, 1, 1) \rightarrow \text{concatenate}(\mathbf{c}_i)\} \rightarrow \mathbf{z}_i \end{aligned}$$

Where  $\text{CNN}_{res}$  follows the same architecture than  $\text{MLP}_{res}$  but replacing the Linear Layers by Conv1d layers with stride=1 and kernel\_size=1. In other words, both architectures are equivalent since a CNN

with kernel size and stride 1 is equivalent to an MLP that broadcasts over the batch size and sequence length. Formally, we write  $\text{CNN}_{res}$  as:

$$\text{Input} \rightarrow \{\text{conv1d}(\text{nf}, \text{nf}/2, 1, 1) \rightarrow \text{Swish}() \rightarrow \text{conv1d}(\text{nf}/2, \text{nf}, 1, 1) \rightarrow \text{Addition}(\text{Input})\} \rightarrow \text{Output}$$

#### Edge update $\phi_e$

Consists of two layers MLP. We divide the number of features by two in the intermediate layer for efficiency

$$[\mathbf{h}_i, \mathbf{h}_j] \rightarrow \{\text{LinearLayer}(2 \cdot \text{nf}, \text{nf}/2) \rightarrow \text{Swish}() \rightarrow \text{LinearLayer}(\text{nf}/2, \text{nf}) \rightarrow \text{Swish}()\} \rightarrow \mathbf{m}_{ij}.$$

#### Node update $\phi_h$

$$[\mathbf{h}_i^l, \mathbf{m}_i] \rightarrow \{\text{LinearLayer}(2 \cdot \text{nf}, \text{nf}) \rightarrow \text{Swish}() \rightarrow \text{LinearLayer}(\text{nf}, \text{nf}) \rightarrow \text{Addition}(\mathbf{h}_i^l)\} \rightarrow \mathbf{h}_i^{l+1}$$

#### Edge inference $\phi_\alpha$

$$[\mathbf{m}_{ij}] \rightarrow \{\text{LinearLayer}(\text{nf}, 1) \rightarrow \text{Sigmoid}()\} \rightarrow \alpha_{ij}$$

## B METR-LA AND PEMS-BAY

METR-LA is a traffic dataset collected from the highway of Los Angeles. It contains 207 nodes, a sampling resolution of 5 minutes and 34,272 samples per node (i.e. length of each time series).

PEMS-BAY is also a traffic dataset with 325 nodes located in Bay Area. The sampling resolution is also 5 minutes and it contains 52,116 samples per time series / node.

Both datasets METR-LA and PEMS-BAY can be download from the following link: <https://github.com/liyaguang/DCRNN>

|          | (N) #Nodes | # Samples | Resolution | Context length | Pred. length |
|----------|------------|-----------|------------|----------------|--------------|
| METR-LA  | 207        | 34,272    | 5 min      | 12             | 12           |
| PEMS-BAY | 325        | 52,116    | 5 min      | 12             | 12           |

Table 8: METR-LA and PEMS-BAY specifications.

### B.1 IMPLEMENTATION DETAILS

In this experiment (METR-LA and PEMS-BAY datasets) we used the exact same training configuration as (Shang et al., 2021). Given the whole training time series panel of dimensionality ( $N \times \text{Length}$ ), where Length is the number of samples of the training partition, we construct the input to the network by uniformly slicing windows  $\mathbf{x}_{t_0:t} \in \mathbb{R}^{N \times 12}$  of length 12. The ground truth labels are obtained in the same way, by slicing the next 12 time steps  $\mathbf{x}_{t:t+12} \in \mathbb{R}^{N \times 12}$ . The same slicing process is done in validation and test with their respective partitions. The sliced windows are uniformly distributed through the whole time series panel.

All our models (FC-GNN, BP-GNN, NE-GNN) have been trained with Adam optimizer, batch size 16 and 2 layers in the GNN module. The number of features "nf" in the hidden layers is 64, The learning rates and number of epochs are provided in the following Table 9.

|          |        | Learning Rate     | Decay at epochs | Decay factor | Epochs |
|----------|--------|-------------------|-----------------|--------------|--------|
| METR-LA  | NE-GNN | $2 \cdot 10^{-3}$ | [20, 30, 40]    | 10           | 200    |
|          | FC-GNN | $5 \cdot 10^{-3}$ | [20, 30, 40]    | 10           | 200    |
|          | BP-GNN | $2 \cdot 10^{-3}$ | [20, 30, 40]    | 10           | 200    |
| PEMS-BAY | NE-GNN | $2 \cdot 10^{-4}$ | [50]            | 10           | 300    |
|          | FC-GNN | $2 \cdot 10^{-4}$ | [50]            | 10           | 300    |
|          | BP-GNN | $2 \cdot 10^{-4}$ | [50]            | 10           | 300    |

Table 9: Learning rates for METR-LA and PEMS-BAY datasets

Time results have been run for batch size 16 in a Tesla V100-SXM GPU. All hyperparameters have been tuned in the validation partition using the following search spaces. The learning rate search space was  $\text{lr} \in \{1 \cdot 10^{-4}, 2 \cdot 10^{-4}, 5 \cdot 10^{-4}, 1 \cdot 10^{-3}, 2 \cdot 10^{-3}, 5 \cdot 10^{-3}\}$ . The number of features per layer "nf" was chosen among  $\text{nf} \in \{32, 64, 128\}$ . The number of layers was chosen among  $\{1, 2, 3, 4\}$ . The learning rate decay and the decay factor was not modified and left the same as in the original code from (Shang et al., 2021). The number of epochs was chosen large enough to do early stopping in the validation partition when the validation loss stops decreasing.

## B.2 BASELINES

Regarding the baselines reported in this experiment, LDS (Franceschi et al., 2019) and STGCN (Yu et al., 2017) are not evaluated on METR-LA and PEMS-BAY in their original papers, therefore, for STGCN we used the results provided in the WaveNet paper (Wu et al., 2019) which were computed by the same WaveNet authors and for LDS we used the results provided in the GTS work (Shang et al., 2021). For the DCRNN timing results we used the unofficial Pytorch implementation [https://github.com/chnsh/DCRNN\\_PyTorch](https://github.com/chnsh/DCRNN_PyTorch)

## B.3 METR-LA AND PEMS-BAY RESULTS WITH STANDARD DEVIATION

In this subsection we report the standard deviations for METR-LA and PEMS-BAY results.

|                       | 15 min         |                |                 | METR-LA<br>30 min |                |                 | 60 min         |                |                  |
|-----------------------|----------------|----------------|-----------------|-------------------|----------------|-----------------|----------------|----------------|------------------|
|                       | MAE            | RMSE           | MAPE            | MAE               | RMSE           | MAPE            | MAE            | RMSE           | MAPE             |
| <i>Ablation study</i> |                |                |                 |                   |                |                 |                |                |                  |
| NE-GNN (w/o id)       | 2.80 $\pm$ .01 | 5.73 $\pm$ .02 | 7.50% $\pm$ .03 | 3.40 $\pm$ .00    | 7.15 $\pm$ .02 | 9.74% $\pm$ .12 | 4.22 $\pm$ .01 | 8.79 $\pm$ .04 | 13.06% $\pm$ .26 |
| FC-GNN (w/o id)       | 2.77 $\pm$ .00 | 5.65 $\pm$ .01 | 7.39% $\pm$ .06 | 3.36 $\pm$ .00    | 7.02 $\pm$ .02 | 9.59% $\pm$ .06 | 4.14 $\pm$ .01 | 8.64 $\pm$ .06 | 12.70% $\pm$ .11 |
| NE-GNN                | 2.69 $\pm$ .01 | 5.57 $\pm$ .04 | 7.21% $\pm$ .01 | 3.14 $\pm$ .01    | 6.74 $\pm$ .05 | 9.01% $\pm$ .09 | 3.62 $\pm$ .01 | 7.88 $\pm$ .05 | 10.94% $\pm$ .07 |
| <i>Our models</i>     |                |                |                 |                   |                |                 |                |                |                  |
| FC-GNN                | 2.60 $\pm$ .02 | 5.19 $\pm$ .06 | 6.78% $\pm$ .12 | 2.95 $\pm$ .02    | 6.15 $\pm$ .08 | 8.14% $\pm$ .16 | 3.35 $\pm$ .03 | 7.14 $\pm$ .09 | 9.73% $\pm$ .27  |
| BP-GNN (K=4)          | 2.64 $\pm$ .01 | 5.37 $\pm$ .03 | 7.07% $\pm$ .08 | 3.02 $\pm$ .02    | 6.42 $\pm$ .05 | 8.46% $\pm$ .08 | 3.40 $\pm$ .02 | 7.32 $\pm$ .05 | 9.91% $\pm$ .19  |

Table 10: METR-LA results including standard deviations.

|                       | 15 min         |                |                 | PEMS-BAY<br>30 min |                |                  | 60 min         |                |                 |
|-----------------------|----------------|----------------|-----------------|--------------------|----------------|------------------|----------------|----------------|-----------------|
|                       | MAE            | RMSE           | MAPE            | MAE                | RMSE           | MAPE             | MAE            | RMSE           | MAPE            |
| <i>Ablation study</i> |                |                |                 |                    |                |                  |                |                |                 |
| NE-GNN (w/o id)       | 1.40 $\pm$ .00 | 3.03 $\pm$ .01 | 2.92% $\pm$ .02 | 1.85 $\pm$ .00     | 4.25 $\pm$ .02 | 4.21% $\pm$ .04  | 2.39 $\pm$ .01 | 5.50 $\pm$ .03 | 5.93% $\pm$ .07 |
| FC-GNN (w/o id)       | 1.39 $\pm$ .00 | 3.00 $\pm$ .01 | 2.88% $\pm$ .01 | 1.82 $\pm$ .00     | 4.18 $\pm$ .01 | 4.11% $\pm$ .01  | 2.32 $\pm$ .01 | 5.35 $\pm$ .03 | 5.71% $\pm$ .02 |
| NE-GNN                | 1.36 $\pm$ .00 | 2.88 $\pm$ .01 | 2.86% $\pm$ .02 | 1.72 $\pm$ .01     | 3.91 $\pm$ .03 | 3.93 % $\pm$ .05 | 2.07 $\pm$ .01 | 4.79 $\pm$ .04 | 5.04% $\pm$ .06 |
| <i>Our models</i>     |                |                |                 |                    |                |                  |                |                |                 |
| FC-GNN                | 1.33 $\pm$ .00 | 2.82 $\pm$ .01 | 2.79% $\pm$ .03 | 1.65 $\pm$ .00     | 3.75 $\pm$ .01 | 3.72% $\pm$ .06  | 1.93 $\pm$ .01 | 4.46 $\pm$ .02 | 4.53% $\pm$ .06 |
| BP-GNN (K=4)          | 1.33 $\pm$ .00 | 2.82 $\pm$ .01 | 2.80% $\pm$ .02 | 1.66 $\pm$ .01     | 3.78 $\pm$ .01 | 3.75% $\pm$ .03  | 1.94 $\pm$ .01 | 4.46 $\pm$ .02 | 4.57% $\pm$ .04 |

Table 11: PEMS-BAY results including standard deviations.

## C SINGLE STEP FORECASTING

Electricity, Solar-Energy, Electricity and Exchange Rate datasets can be downloaded from the following link: <https://github.com/laiguokun/multivariate-time-series-data>

|               | #Nodes | # Samples | Resolution | Context length | Pred. length |
|---------------|--------|-----------|------------|----------------|--------------|
| Solar-Energy  | 137    | 52,560    | 10 min     | 168            | 1            |
| Traffic       | 862    | 17,544    | 1 hour     | 168            | 1            |
| Electricity   | 321    | 26,304    | 1 hour     | 168            | 1            |
| Exchange-Rate | 8      | 7,588     | 1 day      | 168            | 1            |

Table 12: Dataset specifications.

### C.1 IMPLEMENTATION DETAILS

In this experiment we used the exact same training process as (Wu et al., 2020). Similarly to METR-LA and PEMS-BAY, the sample construction process, consists of windows uniformly sliced from the time series panel and inputted to the network. Specifically, in this experiment, given the training time series panel of dimensionality  $(N \times \text{Length})$ , where Length is the number of samples of the training partition, we slice windows  $\mathbf{x}_{t_0:t} \in \mathbb{R}^{N \times 168}$  of length 168 which are the input to our network. In this experiment, we only forecast one time step into the future such that the length of the forecasts and ground truth labels is 1.

All our models (FC-GNN, BP-GNN, NE-GNN) have been trained with Adam optimizer. The number of features "nf" in the hidden layers is 128, the number of layers in the GNN is 2. The encoder network in this experiment is a Convolutional Neural Networks previously described in Appendix A. Following, we provide a table with the different learning rates, number of epochs and batch sizes for all datasets. All models NE-GNN, FC-GNN and BP-GNN were trained with the same training parameters.

|               | Learning Rate     | Batch Size | Epochs |
|---------------|-------------------|------------|--------|
| Solar-Energy  | $5 \cdot 10^{-4}$ | 4          | 30     |
| Traffic       | $2 \cdot 10^{-4}$ | 2          | 50     |
| Electricity   | $2 \cdot 10^{-4}$ | 4          | 80     |
| Exchange-Rate | $1 \cdot 10^{-4}$ | 4          | 100    |

Table 13: Table of hyperparameters for Solar-Energy, Traffic, Electricity and Exchange-Rate.

All hyperparameters have been tuned in the validation partition using the following search spaces. The learning rate search space was  $\text{lr} \in \{5 \cdot 10^{-5}, 1 \cdot 10^{-4}, 2 \cdot 10^{-4}, 5 \cdot 10^{-4}, 1 \cdot 10^{-3}, 2 \cdot 10^{-3}\}$ . The number of features nf was chosen among  $\{32, 64, 128\}$ , the number of layers chosen among  $\{1, 2, 3, 4, 8\}$  by choosing between a trade-off of accuracy and efficiency. The number of epochs was chosen large enough such that the validation loss would stop decreasing. The batch size was set to 4, except for Traffic where it was reduced to 2 in order to fit in memory the more expensive explored configurations.

### C.2 EVALUATION METRICS

The evaluation metrics for this experiments are exactly the same as for (Lai et al., 2018); (Shih et al., 2019); (Wu et al., 2020). The following equations are extracted from (Lai et al., 2018). The Root Relative Squared Error (RSE) is defined as:

$$RSE = \frac{\sqrt{\sum_{(i,t) \in \Omega_{Test}} (\mathbf{x}_{it} - \hat{\mathbf{x}}_{it})^2}}{\sqrt{\sum_{(i,t) \in \Omega_{Test}} (\mathbf{x}_{it} - \text{mean}(\mathbf{x}))^2}}$$

The Empirical Correlation Coefficient (CORR) is defined as:

$$\text{CORR} = \frac{1}{N} \sum_{i=1}^N \frac{\sum_t (\mathbf{x}_{it} - \text{mean}(\mathbf{x}_i)) (\hat{\mathbf{x}}_{it} - \text{mean}(\hat{\mathbf{x}}_i))}{\sqrt{\sum_t (\mathbf{x}_{it} - \text{mean}(\mathbf{x}_i))^2 (\hat{\mathbf{x}}_{it} - \text{mean}(\hat{\mathbf{x}}_i))^2}}$$

Where  $\mathbf{x}, \hat{\mathbf{x}} \in \mathbb{R}^{N \times T}$ .

### C.3 SINGLE STEP RESULTS WITH STANDARD DEVIATION

In this subsection we report the standard deviations for Solar-Energy, Traffic, Electricity and Exchange-Rate results.

| Dataset         |         | Solar-Energy  |               |               |               | Traffic       |               |               |               |
|-----------------|---------|---------------|---------------|---------------|---------------|---------------|---------------|---------------|---------------|
| Methods         | Metrics | Horizon       |               |               |               | Horizon       |               |               |               |
|                 |         | 3             | 6             | 12            | 24            | 3             | 6             | 12            | 24            |
| NE-GNN          | RSE     | .1898 ± .0018 | .2580 ± .0013 | .3472 ± .0059 | .4441 ± .0083 | .4212 ± .0007 | .4586 ± .0017 | .4679 ± .0031 | .4743 ± .0036 |
|                 | CORR    | .9829 ± .0003 | .9663 ± .0003 | .9367 ± .0025 | .8905 ± .0052 | .8951 ± .0005 | .8748 ± .0007 | .8700 ± .0015 | .8670 ± .0013 |
| FC-GNN          | RSE     | .1651 ± .0006 | .2202 ± .0020 | .2981 ± .0035 | .3997 ± .0047 | .4057 ± .0012 | .4395 ± .0049 | .4624 ± .0021 | .4620 ± .0033 |
|                 | CORR    | .9876 ± .0002 | .9765 ± .0003 | .9551 ± .0011 | .9148 ± .0024 | .9024 ± .0006 | .8850 ± .0004 | .8764 ± .0015 | .8751 ± .0007 |
| BP-GNN<br>(K=4) | RSE     | .1704 ± .0017 | .2257 ± .0020 | .3072 ± .0095 | .4050 ± .0082 | .4095 ± .0012 | .4470 ± .0062 | .4640 ± .0033 | .4641 ± .0024 |
|                 | CORR    | .9865 ± .0002 | .9751 ± .0005 | .9522 ± .0033 | .9138 ± .0024 | .8999 ± .0005 | .8820 ± .0007 | .8744 ± .0015 | .8723 ± .0013 |

Table 14: Solar-Energy and Traffic results including standard deviations.

| Dataset         |         | Electricity   |               |               |               | Exchange-Rate |               |               |               |
|-----------------|---------|---------------|---------------|---------------|---------------|---------------|---------------|---------------|---------------|
| Methods         | Metrics | Horizon       |               |               |               | Horizon       |               |               |               |
|                 |         | 3             | 6             | 12            | 24            | 3             | 6             | 12            | 24            |
| NE-GNN          | RSE     | .0762 ± .0007 | .0917 ± .0029 | .0966 ± .0018 | .0994 ± .0019 | .0175 ± .0002 | .0244 ± .0002 | .0338 ± .0006 | .0447 ± .0008 |
|                 | CORR    | .9494 ± .0006 | .9362 ± .0009 | .9308 ± .0006 | .9262 ± .0006 | .9769 ± .0001 | .9686 ± .0005 | .9535 ± .0003 | .9352 ± .0003 |
| FC-GNN          | RSE     | .0732 ± .0007 | .0907 ± .0041 | .0915 ± .0026 | .0979 ± .0030 | .0174 ± .0001 | .0245 ± .0002 | .0344 ± .0010 | .0450 ± .0013 |
|                 | CORR    | .9521 ± .0008 | .9404 ± .0008 | .9351 ± .0007 | .9294 ± .0006 | .9772 ± .0001 | .9685 ± .0004 | .9538 ± .0008 | .9349 ± .0007 |
| BP-GNN<br>(K=4) | RSE     | .0740 ± .0010 | .0898 ± .0041 | .0940 ± .0025 | .0980 ± .0019 | .0175 ± .0001 | .0244 ± .0003 | .0339 ± .0004 | .0442 ± .0005 |
|                 | CORR    | .9519 ± .0004 | .9396 ± .0007 | .9345 ± .0007 | .9288 ± .0001 | .9769 ± .0003 | .9684 ± .0002 | .9530 ± .0007 | .9360 ± .0011 |

Table 15: Electricity and Exchange-Rate results including standard deviations.

## D INFERRED GRAPH ANALYSIS

### D.1 DATASETS

In the Inferred graph analysis experiment we presented two synthetic datasets, "Cycle Graph Gaussian" and "Noisy Sinusoids". Next, we provide a more detailed explanation on how these datasets have been generated:

- **Cycle Graph Gaussians:** This dataset consists of a panel of  $N=10$  time series of length  $T=10,000$ , where each time series  $i$  at time step  $t$  has been sampled from the past  $t-5$  of another time series  $i-1 \bmod N$  from the same panel. The resulting multivariate time series adjacency matrix is a Cyclic Directed Graph where each variable in the panel depends on the previously indexed one. Formally the generation process is written as

$$\mathbf{x}_{i,t} \sim \mathcal{N}(\beta \mathbf{x}_{(i-1 \bmod N),t-5}; \sigma^2) \quad (8)$$

Where  $\beta = 0.9$  and  $\sigma = 0.5$ .

- **Noisy Sinusoids:** Motivated by the Discrete Sine Transformation. This dataset consists of  $N = 10$  time series of length  $T = 10,000$  generated as the weighted sum of different sinusoids with different frequencies and amplitudes. More formally we define a time series  $\mathbf{x}_i$  as:

$$\mathbf{x}_i = \sum_{k=1}^M B_{i,m} \sin(2\pi w_{i,m} t) + \epsilon_{i,t} \quad (9)$$

Where  $B_{i,k}$  is sampled from a Uniform distribution  $\tilde{B}_{i,m} \sim \mathcal{U}(0, 1)$  and further normalized  $B_{i,m} = \frac{\tilde{B}_{i,m}}{\sum_k \tilde{B}_{i,m}}$ .  $w_{i,m}$  is also sampled from a uniform distribution  $w_{i,m} \sim \mathcal{U}(0, 0.2)$  and  $\epsilon_{i,t}$  is sampled from a Gaussian distribution  $\epsilon_{i,t} \sim \mathcal{N}(0, 0.2^2)$ . Finally,  $B_{i,m}$  and  $w_{i,m}$  are shared among the first half signals  $1 \leq i \leq 5$  of the panel and among the second half  $6 \leq i \leq 10$ . We choose  $M = 3$ .

The time series in both datasets have been splitted in train/val/test as 6K/2K2K. In figures [4](#) and [5](#) we plot the first 200 timesteps of the training set of Cycle Graph Gaussians and Noisy Sinusoids datasets respectively.

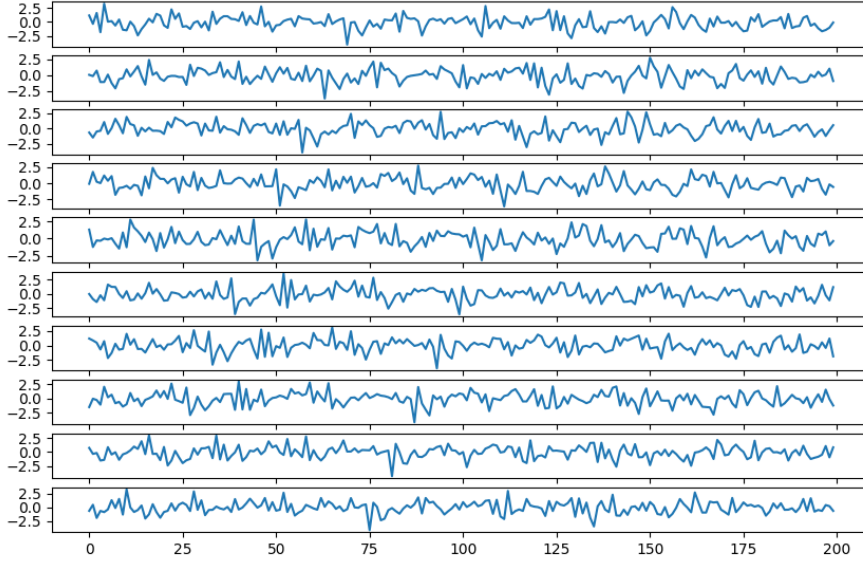

Figure 4: First 200 timesteps of the Cycle Graph Gaussian dataset.

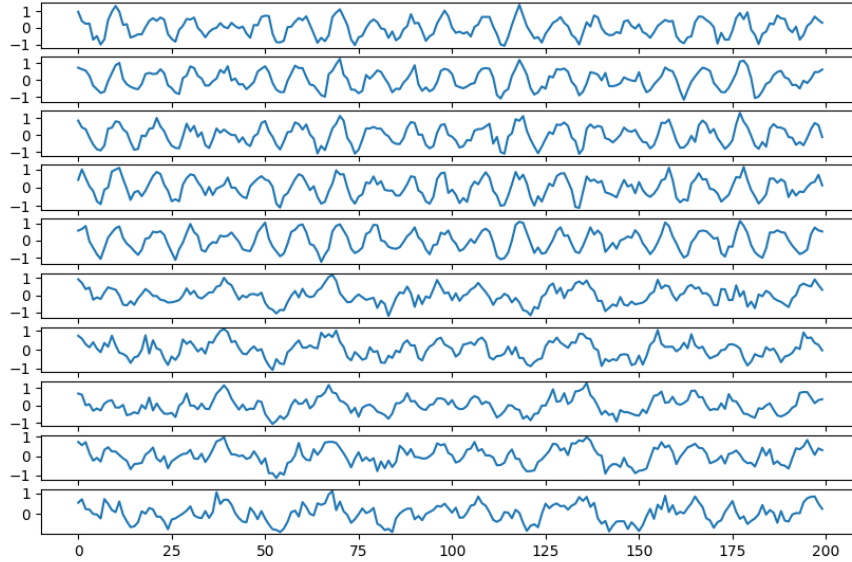

Figure 5: First 200 timesteps of Noisy Sinusoids dataset.

## D.2 IMPLEMENTATION DETAILS

In the Inferred Graph Analysis, all models have been trained for 100 epochs, learning rate of  $2 \cdot 10^{-3}$ , weight decay  $10^{-14}$ . The context length (input length of the sequence) is 6, the prediction length (output length of the sequence) is 1. The Mean Absolute Error between prediction and ground

truth has been minimized for training. We also added a small regularization value to the loss  $R = \frac{10^{-6}}{\#edges} \sum_{i,j} abs(A_{i,j})$  that pushes unnecessary edges closer to 0 for sharper visualizations.

In both BP-GNN and FC-GNN we used the same MLP encoder than the one used METR-LA and PEMS-BAY experiments defined in the Appendix section [A.2](#). The Graph Convolutional layer consists of only 1 layer. Since the edge inference is dynamic we obtained the reported Adjacency matrices by averaging over 10 different  $t$ .

### D.3 FURTHER RESULTS

In this section we report further inferred adjacency matrices as in Experiment [5.4](#) when modifying the random seed. As mentioned in [5.4](#), different random seeds can produce different adjacency matrices.

|        |                      |           | Expected Adjacency | NE-GNN | FC-GNN | BP-GNN K=10 | BP-GNN K=5 | BP-GNN K=2 | BP-GNN K=1 |
|--------|----------------------|-----------|--------------------|--------|--------|-------------|------------|------------|------------|
| Seed 0 | Cycle Graph Gaussian | Adjacency |                    |        |        |             |            |            |            |
|        |                      | MAE       | -                  | 0.9291 | 0.4023 | 0.4098      | 0.4149     | 0.4295     | 0.4955     |
|        | Noisy Sinusoids      | Adjacency |                    |        |        |             |            |            |            |
|        |                      | MAE       | -                  | 0.2149 | 0.1868 | 0.1873      | 0.1878     | 0.1881     | 1.892      |
| Seed 1 | Cycle Graph Gaussian | Adjacency |                    |        |        |             |            |            |            |
|        |                      | MAE       | -                  | 0.9291 | 0.4020 | 0.4082      | 0.4175     | 0.4241     | 0.4363     |
|        | Noisy Sinusoids      | Adjacency |                    |        |        |             |            |            |            |
|        |                      | MAE       | -                  | 0.2141 | 0.1876 | 0.1877      | 0.1895     | 0.1866     | 0.1977     |
| Seed 2 | Cycle Graph Gaussian | Adjacency |                    |        |        |             |            |            |            |
|        |                      | MAE       | -                  | 0.9287 | 0.4024 | 0.4113      | 0.4121     | 0.4249     | 0.5511     |
|        | Noisy Sinusoids      | Adjacency |                    |        |        |             |            |            |            |
|        |                      | MAE       | -                  | 0.2143 | 0.1866 | 0.1886      | 0.1918     | 0.1871     | 0.1879     |
| Seed 3 | Cycle Graph Gaussian | Adjacency |                    |        |        |             |            |            |            |
|        |                      | MAE       | -                  | 0.9283 | 0.4009 | 0.4109      | 0.4116     | 0.4313     | 0.4862     |
|        | Noisy Sinusoids      | Adjacency |                    |        |        |             |            |            |            |
|        |                      | MAE       | -                  | 0.2159 | 0.1859 | 0.1876      | 0.1873     | 0.1879     | 0.1878     |

Figure 6: Inferred adjacency matrices and MAE losses in the proposed synthetic datasets for seeds {0, 1, 2, 3}.

In the previous Figure 6 we presented the inferred adjacency matrices for FC-GNN and BP-GNN in a synthetic dataset. In Experiment 5.4 we mentioned that we constructed the BP-GNN matrices  $\tilde{A} = A_2 A_1$  as the product of two bipartite graph matrices  $A_2$  and  $A_1$ . Following we provide the visualization of the BP-GNN  $A_2$  and  $A_1$ .



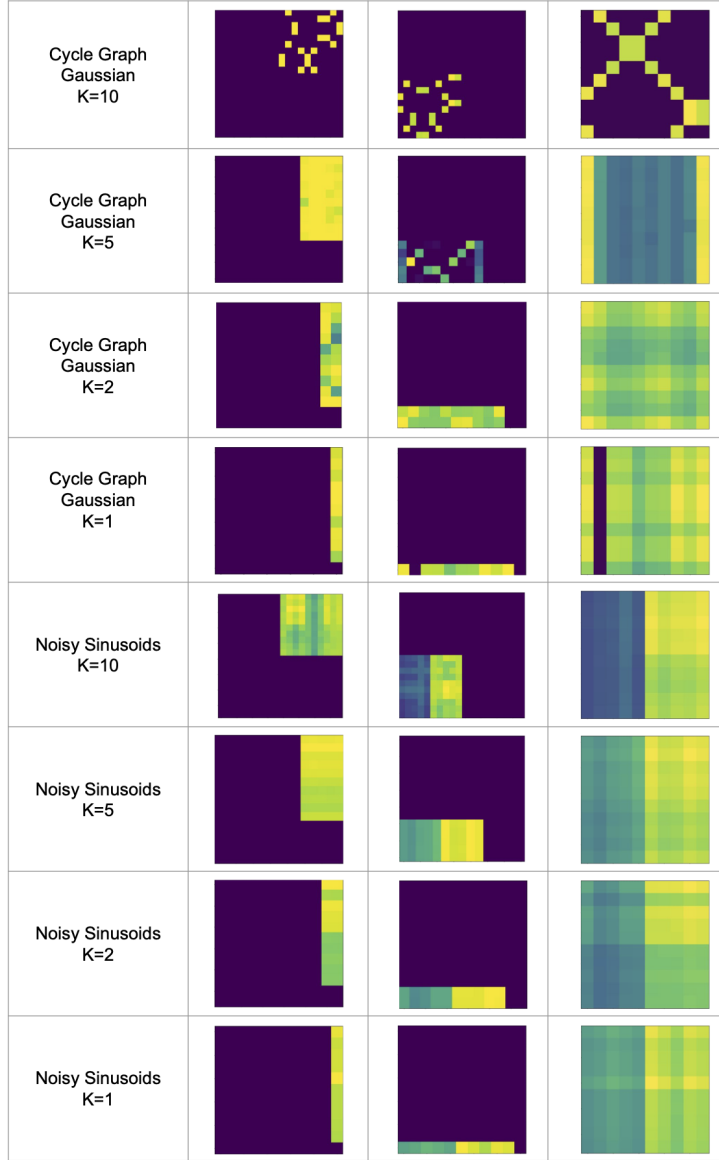

Figure 7: Inferred adjacency matrices in BP-GNN.

#### D.4 INFERRED GRAPH FOR METR-LA

In this section we analyze the adjacency matrices inferred by our FC-GNN method in METR-LA. Notice that in BP-GNN, matrices  $\tilde{A} = A_2 A_1$  are constrained to be very dense for  $K \ll N$  values when nodes communicate. This is because  $N$  nodes have to share the same  $K$  auxiliary nodes to communicate. METR-LA contains 207 nodes, and we chose BP-GNN to be  $K = 4$ . This resulted in very competitive performance and very cheap computation time, but the obtained adjacencies are very dense and not as meaningful as the ones obtained from FC-GNN. Therefore, in the following plots, we only report the matrices  $A$  inferred by the FC-GNN method. As in the previous synthetic experiment, we build the adjacency matrices in the FC-GNN case from the inferred values  $A_{ij} = \alpha_{ij}$ . We used the exact same training settings as in the main experiment section 5.2, but this time we only used one graph layer in the FC-GNN module from which we obtained the  $\alpha_{ij}$  values. The provided adjacency has been averaged over 10 different  $t$  values.

In METR-LA, sensors are spatially located around a city. Therefore, just for comparison, we also report a matrix built from the distance between each pair of sensors. We call it  $A_{sim}$ , where each input  $A_{sim}[i, j]$  is proportional to the negative distance between the two sensors  $A_{sim}[i, j] = \text{bias} - \text{dist}(i, j)$ . We can expect to see some correlations between this matrix and the inferred one, but this does not have to be the case. Close sensors can be correlated, but also far away sensors can be correlated (e.g. we can expect far away residential areas to have a simultaneous increase in traffic right before working hours). Matrices are presented in the following figure,  $A_{sim}$  and the inferred adjacency  $A$ .

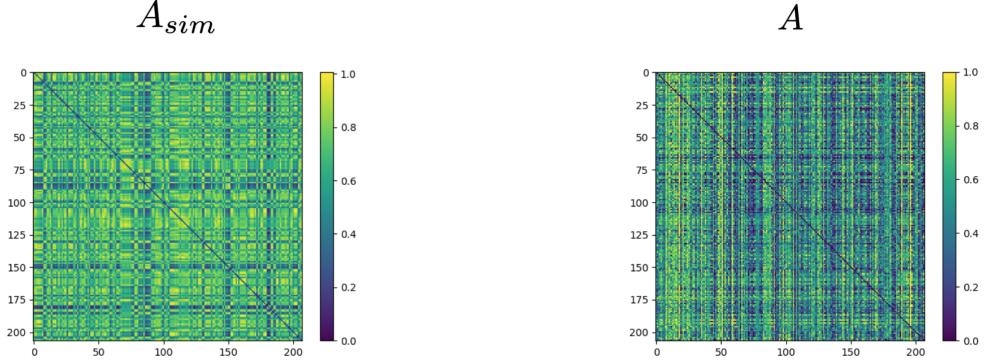

Figure 8:  $A_{sim} \rightarrow$  matrix obtained from the negative distance among sensors and  $A \rightarrow$  Inferred adjacency matrix by FC-GNN.

Additionally, our model infers matrices dynamically for each  $t$ . This means that the inferred adjacency matrix can change depending on the input  $\mathbf{x}_{t0:t}$  for different  $t$  values. Following, we plot three different matrices for different  $t$  values and we see that despite the overall adjacencies share similarities for different  $t$ , some components differ as we change  $t$ .

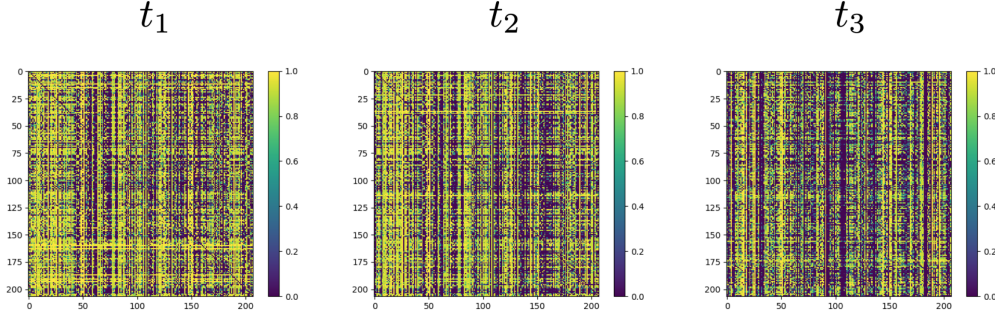

Figure 9: Adjacency matrices for different time steps  $t$ .
